# Supplementary material
Source: PubMed Central journal article supplement (PMC9282758)

# THE LANCET

## Infectious Diseases

### Supplementary appendix

This appendix formed part of the original submission. We post it as supplied by the authors.

Supplement to: Sun F, Lin Y, Wang X, Gao Y, Ye S. Paxlovid in patients who are immunocompromised and hospitalised with SARS-CoV-2 infection. *Lancet Infect Dis* 2022; published online July 14. [https://doi.org/10.1016/S1473-3099\(22\)00430-3](https://doi.org/10.1016/S1473-3099(22)00430-3).

## Supplementary Appendix

### **Paxlovid in immunocompromised, hospitalized patients with SARS-CoV-2 infection: a real-life study from Shanghai**

Fangfang Sun<sup>1</sup>, Yanwei Lin<sup>1</sup>, Xiaodong Wang<sup>1</sup>, Yuan Gao<sup>2</sup>, Shuang Ye<sup>1</sup>

1. Department of Rheumatology, Renji Hospital, School of Medicine, Shanghai Jiaotong University, Shanghai, China.
2. Department of Critical Care Medicine, Renji Hospital, School of Medicine, Shanghai Jiaotong University, Shanghai, China.

Fangfang Sun & Yanwei Lin contributed equally to this manuscript.

Table S1. Baseline characteristics of patients with or without prolonged viral elimination (>10d since diagnosis of SARS-CoV-2 infection) in a Paxlovid registry, April 7, 2022 to May 7, 2022, Renji Hospital South Campus, Shanghai

| Items                 |                                                      | Viral elimination<br>≤10 days (n=28) | Prolonged viral<br>elimination >10 days (n=86) | P      |
|-----------------------|------------------------------------------------------|--------------------------------------|------------------------------------------------|--------|
| Epidemiology          | Age (year)                                           | 63.25 (22.24)                        | 70.91 (17.12)                                  | 0.114  |
|                       | Gender/F n(%)                                        | 13 (46.4)                            | 46 (53.5)                                      | 0.664  |
|                       | Inactivated SARS-CoV-2 vaccine n(%)                  | 14 (50.0)                            | 13 (15.1)                                      | 0.001  |
|                       | 1 dose n(%)                                          | 1 (3.6)                              | 0 (0)                                          | /      |
|                       | 2 doses n(%)                                         | 8 (28.6)                             | 7 (8.1)                                        | /      |
|                       | 3 doses n(%)                                         | 5 (17.9)                             | 6 (7.0)                                        | /      |
|                       | Initiation of Paxlovid since diagnosis(day)          | 4.43 (3.89)                          | 8.48 (4.84)                                    | <0.001 |
|                       | Initiation of Paxlovid ≤ 5days since diagnosis, n(%) | 21 (75.0)                            | 26 (30.2)                                      | <0.001 |
| Disease<br>Severity # | Non-severe                                           | 21 (75.0)                            | 59 (68.6)                                      | 0.872  |
|                       | Severe                                               | 6 (21.4)                             | 20 (23.3)                                      | /      |
|                       | Critical                                             | 1 (3.6)                              | 7 (8.1)                                        | /      |
| Comorbidity           | Hypertension n(%)                                    | 12 (42.9)                            | 37 (43.0)                                      | 1      |
|                       | Diabetes Mellitus n(%)                               | 3 (10.7)                             | 18 (20.9)                                      | 0.274  |
|                       | Coronary heart disease n(%)                          | 5 (17.9)                             | 13 (15.1)                                      | 0.768  |
|                       | Cerebrovascular disease n(%)                         | 7 (25.0)                             | 30 (34.9)                                      | 0.364  |
|                       | Chronic kidney disease n(%)                          | 0 (0.0)                              | 11 (12.8)                                      | 0.063  |
|                       | IC n(%)                                              | 3 (10.7)                             | 32 (37.2)                                      | 0.009  |
| Laboratory<br>Results | Leucocyte (10 <sup>9</sup> /L)                       | 8.49 (16.13)                         | 7.28 (4.51)                                    | 0.033  |
|                       | Lymphocyte (10 <sup>9</sup> /L)                      | 0.97 (0.52)                          | 1.25 (0.63)                                    | 0.045  |
|                       | Hemoglobin (g/L)                                     | 119.74 (25.28)                       | 115.83 (25.50)                                 | 0.597  |
|                       | Platelet (10 <sup>9</sup> /L)                        | 177.74 (71.55)                       | 200.07 (104.77)                                | 0.280  |
|                       | Alanine transaminase (U/L)                           | 24.71 (30.47)                        | 38.26 (69.30)                                  | 0.787  |
|                       | Albumin (g/L)                                        | 35.26 (8.41)                         | 34.44 (5.33)                                   | 0.125  |
|                       | Creatinine (umol/L)                                  | 66.15 (23.05)                        | 72.58 (43.56)                                  | 0.625  |
|                       | Baseline ORF1ab Ct value                             | 26.76 (7.89)                         | 25.76 (7.66)                                   | 0.494  |
|                       | Baseline N Ct value                                  | 25.89 (6.69)                         | 25.11 (6.45)                                   | 0.449  |
| Outcomes              | Time to viral elimination (day) †                    | 8.29 (1.51)                          | 17.27 (5.51)                                   | <0.001 |
|                       | Death*                                               | 0 (0)                                | 3 (3.50)                                       | 1      |

# Disease severity is defined by World Health Organization (WHO) guideline for COVID-19 <sup>5</sup>.

† Viral elimination was defined as both negative for ORF1ab and N genes (Ct value ≥35 by real-time PCR) in two consecutive days. The second negative day was calculated as the time point of viral elimination.

\* One patient died of respiratory failure attributed to COVID-19; the other two patients died of deterioration of underlying comorbidities (decompensated hepatic cirrhosis and heart failure, respectively).

Figure S1. A) Forrest plot of binary logistic regression analysis of patients with prolonged viral elimination (>10days since diagnosis of SARS-CoV-2 established by PCR). B) Changes of ORF1ab Ct values in immunocompromised patients with Paxlovid prescriptions within or beyond 5 days since diagnosis. Red and blue arrows indicate the average time to initiation of Paxlovid in two groups. C) Correlation of the timing to Paxlovid prescription and the duration of viral elimination among IC patients.

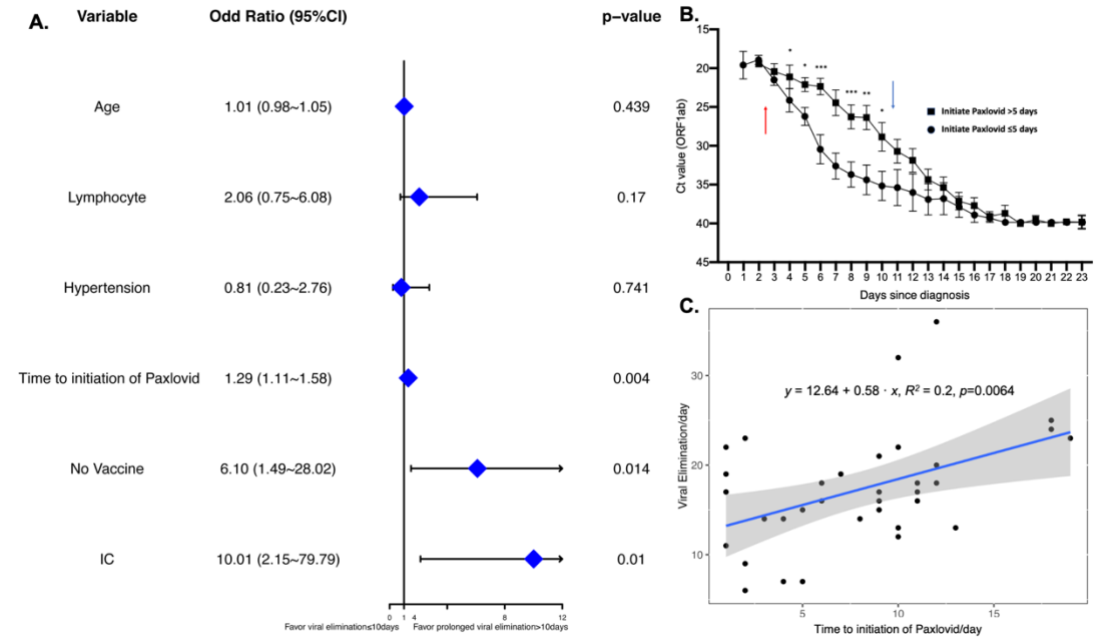

Table S2. Baseline characteristics of immunocompromised (IC) or non-IC patients in the Paxlovid registry

|                    | Items                                                | IC (n=35)       | non-IC (n=79)  | p     |
|--------------------|------------------------------------------------------|-----------------|----------------|-------|
| Epidemiology       | Age (year)                                           | 65.66 (13.22)   | 70.52 (20.57)  | 0.043 |
|                    | Gender/F n(%)                                        | 16 (45.7)       | 43 (54.4)      | 0.422 |
|                    | Inactivated SARS-CoV-2 vaccine n(%)                  | 7 (20.0)        | 20 (25.3)      | 0.637 |
|                    | 1 dose n(%)                                          | 0 (0)           | 1 (1.3)        | /     |
|                    | 2 doses n(%)                                         | 5 (14.3)        | 10 (12.7)      | /     |
|                    | 3 doses n(%)                                         | 2 (5.7)         | 9 (11.4)       | /     |
|                    | Initiation of Paxlovid since diagnosis (day)         | 8.00 (4.94)     | 7.25 (4.94)    | 0.312 |
|                    | Initiation of Paxlovid ≤ 5days since diagnosis, n(%) | 12 (34.3)       | 35 (44.3)      | 0.426 |
| Disease Severity   | Non-severe                                           | 25 (71.4)       | 55 (69.6)      | 0.338 |
|                    | Severe                                               | 6 (17.1)        | 20 (25.3)      | /     |
|                    | Critical                                             | 4 (11.4)        | 4 (5.1)        | /     |
| Comorbidity        | Hypertension n(%)                                    | 10 (28.6)       | 39 (49.4)      | 0.043 |
|                    | Diabetes Mellitus (%)                                | 4 (11.4)        | 17 (21.5)      | 0.295 |
|                    | Coronary heart disease                               | 2 (5.7)         | 16 (20.3)      | 0.055 |
|                    | Cerebrovascular disease n(%)                         | 8 (22.9)        | 29 (36.7)      | 0.194 |
|                    | Chronic kidney disease (%)                           | 6 (17.1)        | 5 (6.3)        | 0.090 |
| Laboratory Results | Leucocyte (10 <sup>9</sup> /L)                       | 9.68 (14.56)    | 6.62 (3.76)    | 0.264 |
|                    | Lymphocyte (10 <sup>9</sup> /L)                      | 1.22 (0.54)     | 1.17 (0.65)    | 0.469 |
|                    | Hemoglobin (g/L)                                     | 113.89 (29.80)  | 118.05 (23.25) | 0.691 |
|                    | Platelet (10 <sup>9</sup> /L)                        | 199.03 (111.21) | 192.81 (92.23) | 0.436 |
|                    | Alanine transaminase (U/L)                           | 36.17 (65.44)   | 34.50 (61.41)  | 0.412 |
|                    | Albumin (g/L)                                        | 34.68 (5.17)    | 34.59 (6.48)   | 0.858 |
|                    | Creatinine (umol/L)                                  | 64.37 (17.54)   | 74.04 (46.05)  | 0.872 |
|                    | Baseline ORF1ab Ct value                             | 24.61 (7.46)    | 26.63 (7.77)   | 0.115 |
| Outcome            | Baseline N Ct value                                  | 24.05 (5.97)    | 25.86 (6.66)   | 0.170 |
|                    | Time to viral elimination (day)                      | 17.29 (6.35)    | 14.08 (5.92)   | 0.005 |
|                    | Viral elimination ≤ 10days n(%)                      | 3 (8.6)         | 25 (31.6)      | 0.009 |
|                    | Death                                                | 0 (0)           | 3 (3.8)        | 0.552 |

Figure S2. Cumulative rate of viral elimination in IC or non-IC patients infected with SARS-CoV-2

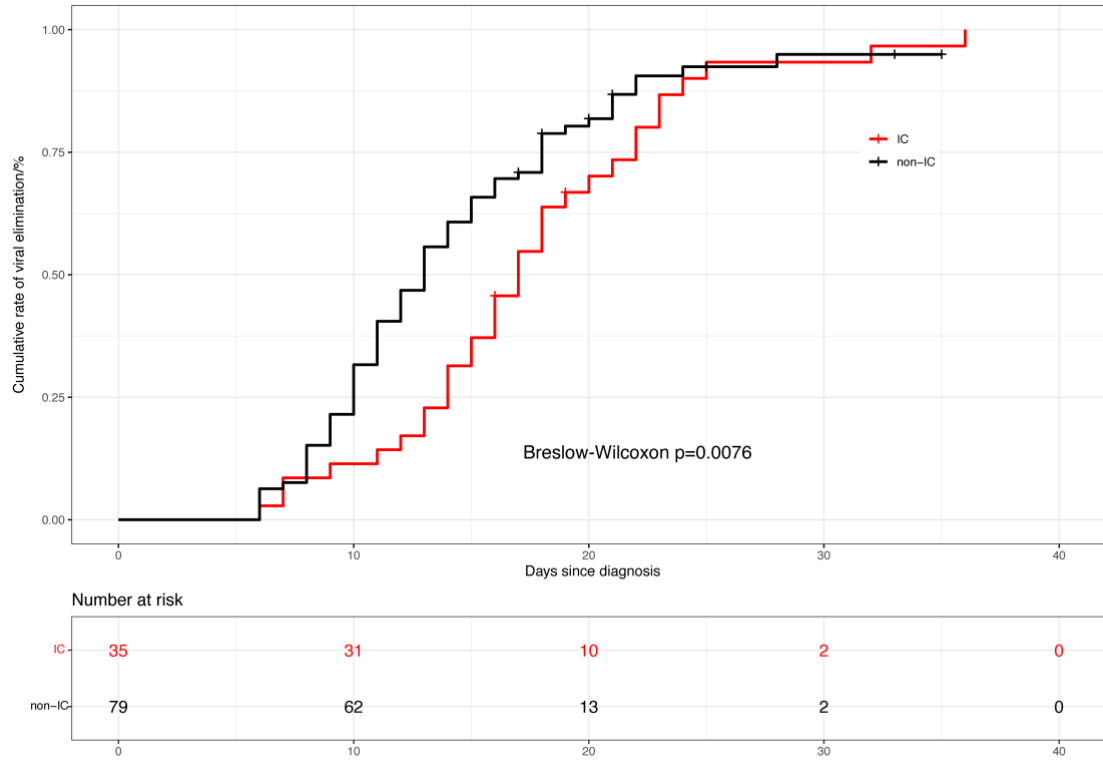

Table S3. Baseline characteristics of IC patients with Paxlovid prescription within or beyond 5 days since the diagnosis of SARS-CoV-2 infection.

| Items              |                                              | Paxlovid ≤ 5 days<br>(n=12) | Paxlovid > 5 days<br>(n=23) | p      |
|--------------------|----------------------------------------------|-----------------------------|-----------------------------|--------|
| Epidemiology       | Age (year)                                   | 67.50 (12.92)               | 64.70 (13.55)               | 0.454  |
|                    | Gender/F n(%)                                | 5 (41.7)                    | 11 (47.8)                   | 1      |
|                    | Inactivated SARS-CoV-2 vaccine n(%)          | 3 (25.0)                    | 4 (17.4)                    | 0.670  |
|                    | 1 dose n(%)                                  | 0 (0)                       | 0 (0)                       | /      |
|                    | 2 doses n(%)                                 | 3 (25.0)                    | 2 (8.7)                     | /      |
|                    | 3 doses n(%)                                 | 0 (0)                       | 2 (8.7)                     | /      |
|                    | Initiation of Paxlovid since diagnosis (day) | 2.58 (1.56)                 | 10.83 (3.49)                | <0.001 |
| Disease Severity   | Non-severe                                   | 7 (58.3)                    | 18 (78.3)                   | 0.274  |
|                    | Severe                                       | 2 (16.7)                    | 4 (17.4)                    | /      |
|                    | Critical                                     | 3 (25.0)                    | 1 (4.3)                     | /      |
| Comorbidity        | Hypertension n(%)                            | 2 (16.7)                    | 0 (0.0)                     | 0.111  |
|                    | Diabetes Mellitus n(%)                       | 5 (41.7)                    | 5 (21.7)                    | 0.258  |
|                    | Coronary heart disease n(%)                  | 1 (8.3)                     | 3 (13.0)                    | 1      |
|                    | Cerebrovascular disease n(%)                 | 4 (33.3)                    | 4 (17.4)                    | 0.402  |
|                    | Chronic kidney disease n(%)                  | 3 (25.0)                    | 3 (13.0)                    | 0.391  |
| Laboratory Results | Leucocyte (10 <sup>9</sup> /L)               | 14.68 (24.36)               | 7.07 (3.19)                 | 0.876  |
|                    | Lymphocyte (10 <sup>9</sup> /L)              | 1.02 (0.45)                 | 1.31 (0.56)                 | 0.146  |
|                    | Hemoglobin (g/L)                             | 109.42 (28.81)              | 116.22 (30.67)              | 0.394  |
|                    | Platelet (10 <sup>9</sup> /L)                | 219.50 (148.88)             | 188.35 (87.65)              | 1      |
|                    | Alanine transaminase (U/L)                   | 62.17 (107.39)              | 22.61 (17.06)               | 0.056  |
|                    | Albumin (g/L)                                | 35.94 (4.77)                | 33.99 (5.36)                | 0.265  |
|                    | Creatinine (umol/L)                          | 60.25 (14.84)               | 66.52 (18.74)               | 0.347  |
|                    | Baseline ORF1ab Ct value                     | 26.94 (8.23)                | 23.39 (6.90)                | 0.289  |
| Outcome            | Baseline N Ct value                          | 25.87 (6.79)                | 23.11 (5.41)                | 0.289  |
|                    | Time to viral elimination (day)              | 13.67 (5.84)                | 19.17 (5.87)                | 0.022  |
|                    | Viral elimination ≤ 10days n(%)              | 3 (25.0)                    | 0 (0)                       | 0.034  |
|                    | Death                                        | 0 (0)                       | 0 (0)                       | /      |

Figure S3. Cumulative rate of viral elimination in IC patients with Paxlovid prescription within or beyond 5 days since diagnosis of SARS-CoV-2 infection

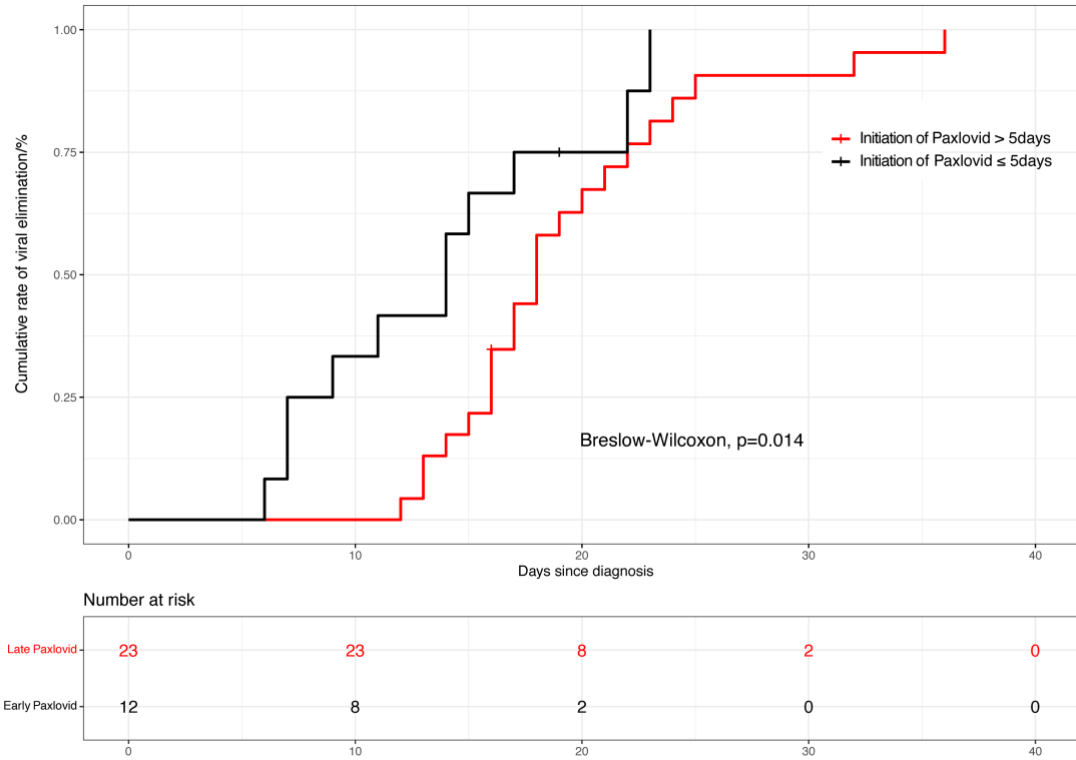

Supplement: mmc1.pdf [file mmc1.pdf]
